# Supplementary material for: Low Diversity of Human Milk Oligosaccharides is Associated with Necrotising Enterocolitis in Extremely Low Birth Weight Infants
Source: MDPI journal article supplement (doi:10.3390/nu10101556), 2018-10-20
Supplement: s1 [file s1]

**a) Proportion of infants with NEC and maternal secretor/Lewis type**

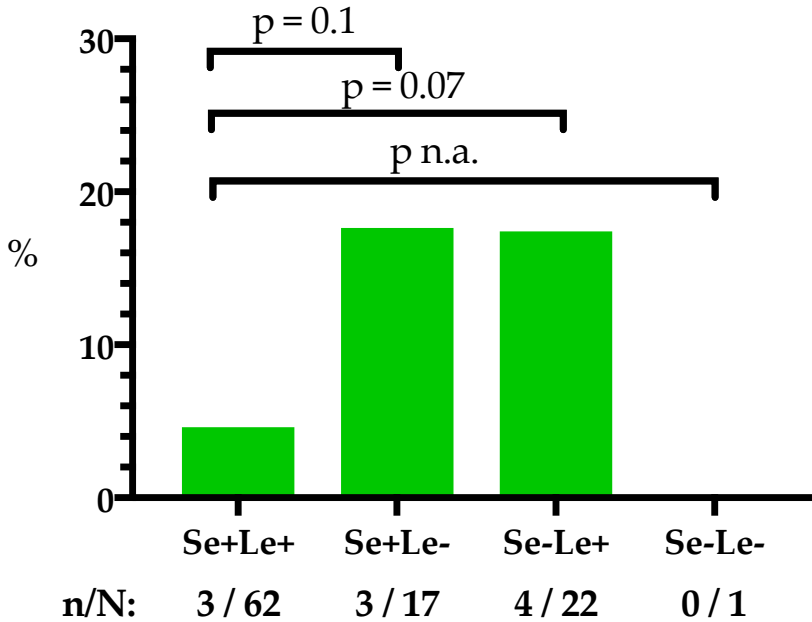

**b) Proportion of infants with culture proven sepsis and maternal secretor/Lewis type**

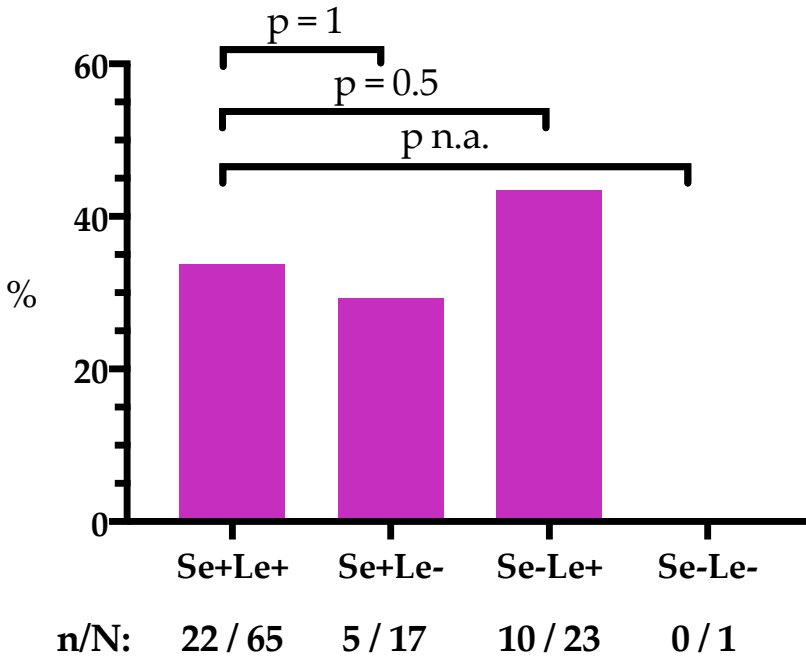

**Figure S1:** n/N indicates the number of infants with or without NEC (a) or culture proven sepsis (b). Fisher's exact test was used to compare the Se+Le+ group with the other groups.
