# Supplementary material for: Low Diversity of Human Milk Oligosaccharides is Associated with Necrotising Enterocolitis in Extremely Low Birth Weight Infants
Source: MDPI journal article supplement (doi:10.3390/nu10101556), 2018-10-20
Supplement: s1 [file s1]

| Milk samples from 36th postmenstrual week |                         | Weight gain to 36th PMW | Length gain to 36th PMW | Head growth to 36th PMW |
|-------------------------------------------|-------------------------|-------------------------|-------------------------|-------------------------|
| <b>3-SL</b>                               | Correlation Coefficient | 0.21                    | 0.21                    | 0.06                    |
|                                           | Sig. (2-tailed)         | 0.09                    | 0.10                    | 0.64                    |
|                                           | n                       | 65                      | 65                      | 65                      |
| <b>6-SL</b>                               | Correlation Coefficient | -0.21                   | 0.04                    | 0.06                    |
|                                           | Sig. (2-tailed)         | 0.09                    | 0.74                    | 0.65                    |
|                                           | n                       | 65                      | 65                      | 65                      |
| <b>LSTa</b>                               | Correlation Coefficient | 0.27                    | 0.23                    | -0.13                   |
|                                           | Sig. (2-tailed)         | 0.03                    | 0.07                    | 0.32                    |
|                                           | n                       | 65                      | 65                      | 65                      |
| <b>LSTb</b>                               | Correlation Coefficient | -0.18                   | 0.02                    | -0.05                   |
|                                           | Sig. (2-tailed)         | 0.15                    | 0.88                    | 0.71                    |
|                                           | n                       | 65                      | 65                      | 65                      |
| <b>LSTc</b>                               | Correlation Coefficient | -0.34                   | -0.25                   | 0.14                    |
|                                           | Sig. (2-tailed)         | 0.01                    | 0.05                    | 0.27                    |
|                                           | n                       | 65                      | 65                      | 65                      |
| <b>DSLNT</b>                              | Correlation Coefficient | -0.08                   | 0.13                    | -0.05                   |
|                                           | Sig. (2-tailed)         | 0.51                    | 0.29                    | 0.67                    |
|                                           | n                       | 65                      | 65                      | 65                      |
| <b>2FL</b>                                | Correlation Coefficient | 0.23                    | 0.15                    | 0.20                    |
|                                           | Sig. (2-tailed)         | 0.07                    | 0.24                    | 0.11                    |
|                                           | n                       | 65                      | 65                      | 65                      |
| <b>3FL</b>                                | Correlation Coefficient | -0.25                   | -0.20                   | -0.17                   |
|                                           | Sig. (2-tailed)         | 0.05                    | 0.12                    | 0.18                    |
|                                           | n                       | 65                      | 65                      | 65                      |
| <b>LDFT</b>                               | Correlation Coefficient | -0.07                   | -0.03                   | -0.02                   |
|                                           | Sig. (2-tailed)         | 0.59                    | 0.83                    | 0.89                    |
|                                           | n                       | 65                      | 65                      | 65                      |
| <b>LNT</b>                                | Correlation Coefficient | -0.12                   | 0.01                    | -0.12                   |
|                                           | Sig. (2-tailed)         | 0.33                    | 0.95                    | 0.36                    |
|                                           | n                       | 65                      | 65                      | 65                      |
| <b>LNnT</b>                               | Correlation Coefficient | 0.01                    | -0.13                   | -0.01                   |
|                                           | Sig. (2-tailed)         | 0.93                    | 0.32                    | 0.97                    |
|                                           | n                       | 65                      | 65                      | 65                      |
| <b>LNFP I</b>                             | Correlation Coefficient | 0.18                    | 0.16                    | 0.12                    |
|                                           | Sig. (2-tailed)         | 0.15                    | 0.20                    | 0.36                    |
|                                           | n                       | 65                      | 65                      | 65                      |
| <b>LNFP II</b>                            | Correlation Coefficient | -0.21                   | -0.13                   | -0.11                   |
|                                           | Sig. (2-tailed)         | 0.10                    | 0.31                    | 0.37                    |
|                                           | n                       | 65                      | 65                      | 65                      |
| <b>LNFP III</b>                           | Correlation Coefficient | 0.02                    | -0.11                   | -0.02                   |
|                                           | Sig. (2-tailed)         | 0.87                    | 0.38                    | 0.86                    |
|                                           | n                       | 65                      | 65                      | 65                      |
| <b>LNDH I</b>                             | Correlation Coefficient | -0.10                   | 0.06                    | 0.02                    |
|                                           | Sig. (2-tailed)         | 0.42                    | 0.63                    | 0.87                    |
|                                           | n                       | 65                      | 65                      | 65                      |
| <b>Total HMO content</b>                  | Correlation Coefficient | 0.11                    | 0.13                    | 0.11                    |
|                                           | Sig. (2-tailed)         | 0.36                    | 0.32                    | 0.40                    |
|                                           | n                       | 65                      | 65                      | 65                      |

**Figure S4.** Correlations between concentrations of individual HMO (micromol/litre) in milk samples from the 36th postmenstrual week and growth (change in z-score from birth to measurement at 36 postmenstrual weeks), analyzed using Spearman's rho correlation coefficient. Significant correlations are highlighted with green for positive and red for negative correlations.
