# Supplementary material for: Low Diversity of Human Milk Oligosaccharides is Associated with Necrotising Enterocolitis in Extremely Low Birth Weight Infants
Source: MDPI journal article supplement (doi:10.3390/nu10101556), 2018-10-20
Supplement: s1 [file s1]

**Figure S2:**

**a) HMO-diversity day 14 and NEC**

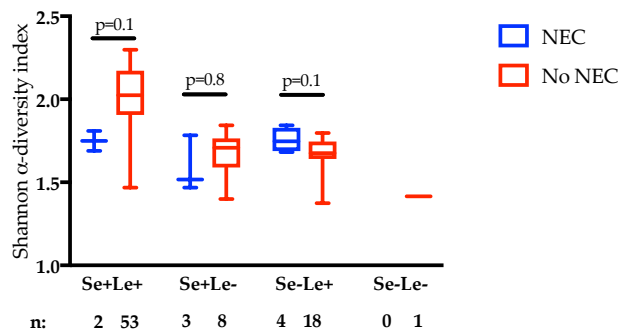

**b) HMO-diversity day 14 and sepsis**

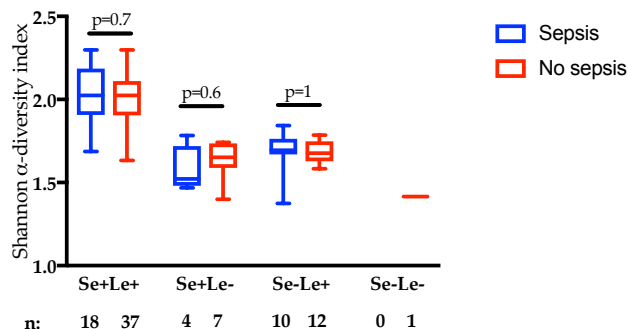

**c) HMO-diversity day 28 and NEC**

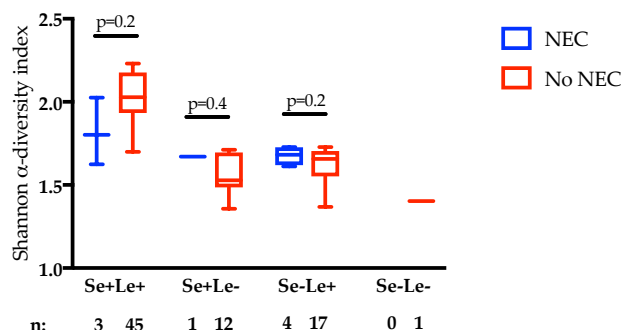

**d) HMO-diversity day 28 and sepsis**

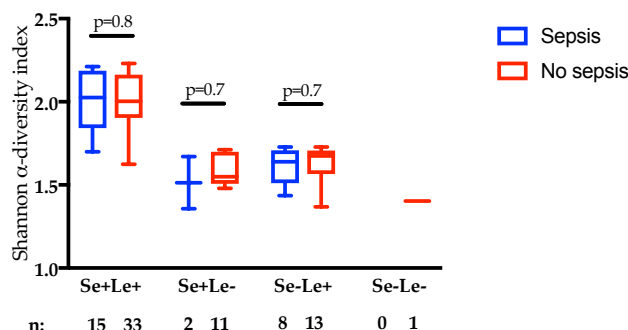

Figure S2: HMO diversity in breast milk samples from day 14 (a and b) or 28 (c and d); and incidence of NEC (a and c) and culture proven sepsis (b and d), plotted according to secretor and Lewis status of the mother. Boxes indicate 25th, 50th and 75th percentiles; whiskers indicate min and max values. *t*-test for independent samples was used to compare means.
